# Supplementary material for: OH, HO 2 , and RO 2 radical chemistry in a rural forest environment: Measurements, model comparisons, and evidence of a missing radical sink
Source: Copernicus journal article supplement (doi:10.5194/egusphere-2023-790), 2023-04-24
Supplement: Supplementary file 1 [file egusphere-2023-790-supplement.pdf]

## Supplementary information

# OH, HO<sub>2</sub>, and RO<sub>2</sub> radical chemistry in a rural forest environment: Measurements, model comparisons, and evidence of a missing radical sink

5 Brandon Bottorff<sup>1</sup>, Michelle M. Lew<sup>1a</sup>, Youngjun Woo<sup>1</sup>, Pamela Rickly<sup>2b</sup>, Matthew D. Rollings<sup>3c</sup>, Benjamin Demming<sup>3d</sup>, Daniel C. Anderson<sup>4e</sup>, Ezra Wood<sup>4</sup>, Hariprasad D. Alwe<sup>5f</sup>, Dylan B. Millet<sup>5</sup>, Andrew Weinheimer<sup>6</sup>, Geoff Tyndall<sup>6</sup>, John Ortega<sup>6</sup>, Sebastien Dusanter<sup>7</sup>, Thierry Leonardis<sup>7</sup>, James Flynn<sup>8</sup>, Matt Erickson<sup>8</sup>, Sergio Alvarez<sup>8</sup>, Jean C. Rivera-Rios<sup>9g</sup>, Joshua D. Shutter<sup>9h</sup>, Frank Keutsch<sup>9</sup>, Detlev Helmig<sup>10</sup>, Wei Wang<sup>10</sup>, Hannah M. Allen<sup>11</sup>, Steven Bertman<sup>12</sup>, and Philip S. Stevens<sup>1,2</sup>

10 <sup>1</sup> Department of Chemistry, Indiana University, Bloomington, IN 47405, USA

<sup>2</sup> O'Neill School of Public and Environmental Affairs, Indiana University, Bloomington, IN 47405, USA

<sup>3</sup> Department of Chemistry, University of Massachusetts, Amherst, MA, 01003, USA

<sup>4</sup> Department of Chemistry, Drexel University, Philadelphia, PA, 19104, USA

<sup>5</sup> Department of Soil, Water, and Climate, University of Minnesota, Twin Cities, Saint Paul, MN, 55108, USA

15 <sup>6</sup> National Center for Atmospheric Research, Boulder, CO, 80305, USA

<sup>7</sup> IMT Nord Europe, Institut Mines- Télécom, Univ. Lille, Center for Energy and Environment, F-59000 Lille, France

<sup>8</sup> Department of Earth and Atmospheric Sciences, University of Houston, Houston, TX, 77004, USA

<sup>9</sup> Department of Chemistry and Chemical Biology, Harvard University, Cambridge, MA, 02138, USA

<sup>10</sup> Boulder A.I.R. LLC, Boulder, CO 80305, USA

20 <sup>11</sup> Division of Chemistry and Chemical Engineering, California Institute of Technology, Pasadena, CA, 91125, USA

<sup>12</sup> Institute of the Environment and Sustainability, Western Michigan University, Kalamazoo, MI, 49008, USA

<sup>a</sup> now at: California Air Resources Board, Sacramento, CA, USA

<sup>b</sup> now at: Colorado Department of Public Health and Environment, Denver, CO, USA

25 <sup>c</sup> now at: Dept. of Chemistry, University of California, Berkeley CA, USA

<sup>d</sup> now at: Dept. of Chemistry, Smith College, Northampton MA, USA

<sup>e</sup> now at: GESTAR II, University of Maryland Baltimore County, Baltimore, MD, USA

<sup>f</sup> now at: Forschungszentrum Jülich, Institute of Energy and Climate Research, Troposphere (IEK-8), Jülich, Germany

<sup>g</sup> now at: School of Chemical & Biomolecular Engineering, Georgia Institute of Technology, Atlanta, GA, USA

30 <sup>h</sup> now at: Department of Soil, Water and Climate, University of Minnesota, St. Paul, MN USA

*Correspondence to:* Brandon Bottorff (brapbott@indiana.edu); Philip S. Stevens (pstevens@indiana.edu)

**Text S1:** In order to determine the relative accuracy of the LIF and ECHAMP radical measurements, on July 25<sup>th</sup> the ECHAMP sampled from the IU calibration source. For this comparison, isoprene was added to the humidified air, producing 50% HO<sub>2</sub> and 50% isoprene-RO<sub>2</sub>. Two data points were collected: 1: Calibration source = 335 ppt HO<sub>2</sub> + isoprene RO<sub>2</sub>, RH = 33%, ECHAMP  
35 measured 326 ppt, 2. Calibration source = 314 ppt HO<sub>2</sub> + isoprene RO<sub>2</sub>, RH = 31%, ECHAMP measured 309 ppt.

One reason for this excellent agreement (within 3%) is that the largest source of uncertainty for the calibration gas concentration - the product of the UV lamp actinic flux and the irradiation time ("Ft") - was tied to readings from ECHAMP as it was determined by the measurement of O<sub>3</sub> in the ECHAMP background channel when sampling dry zero air (Kundu et al., 2019). The Licor 6262 H<sub>2</sub>O measurements used for the IU calibration source also agreed with the water vapor mixing ratios determined using the  
40 ECHAMP RH/T probe within 5%.

Table S1: Measured compounds used as model constraints within RACM and respective measurement sources (CU: University of Colorado, UH: University of Houston, NE: IMT Nord Europe, UM: University of Minnesota, HU: Harvard University, NCAR: National Center for Atmospheric Research, SUNY: University at Albany)

| <b>RACM input</b> | <b>Grouped compounds</b>                 | <b>Source</b> | <b>RACM input</b> | <b>Grouped compounds</b>     | <b>Source</b> |
|-------------------|------------------------------------------|---------------|-------------------|------------------------------|---------------|
| H2                | hydrogen                                 | Calc.         | NO                | nitrous oxide                | NCAR          |
| O3                | ozone                                    | CU            | NO2               | nitric oxide                 | NCAR          |
| CO                | carbon monoxide                          | UH            | HONO              | nitrous acid                 | SUNY          |
| SO2               | sulfur dioxide                           | UH            | ISO               | isoprene                     | UM            |
| H2O               | water vapor                              | UH            | MVK               | methylvinylketone            | UM            |
| CH4               | methane                                  | Calc.         | MACR              | methacrolein                 | UM/NE         |
| ETH               | ethane                                   | NE            | API               | monoterpenes                 | UM            |
| HC3               | propane, n-butane, isobutane             | NE            | BALD              | benzaldehyde                 | UM            |
|                   | isopentane, n-pentane, n-heptane,        |               | ACD               | acetaldehyde                 | UM            |
|                   | dimethylbutane, 2-                       |               | ACT               | acetone                      | UM            |
| HC5               | methylpentane, 3-methylpentane, n-hexane | NE            | HCHO              | formaldehyde                 | HU/NE         |
|                   |                                          |               | ALD               | propanal, butanal            | NE            |
|                   |                                          |               | GLY               | glyoxal                      | NE            |
| HC8               | ethyne, nonane                           | NE            | MGLY              | methylglyoxal                | NE            |
| ETE               | ethene                                   | NE            | BEN               | benzene                      | UM            |
| OLI               | trans-2-butene                           | NE            |                   | toluene,                     |               |
| OLT               | propene, 1-butene                        | NE            | TOL               | ethylbenzene, 2-ethyltoluene | UM/NE         |
| DIEN              | butadiene                                | NE            | XYP/XYM           | m,p-xylene                   | NE            |
| MEK               | methylethylketone                        | NE            | XYO               | o-xylene                     | NE            |

Table S2: Model constraints, their designation within MCM, and respective measurement sources.

| MCM Designation                                 | Measured Constraint      | MCM Designation                   | Measured Constraint |
|-------------------------------------------------|--------------------------|-----------------------------------|---------------------|
| <b>University of Houston</b>                    |                          | <b>IMT Nord Europe</b>            |                     |
| T                                               | temperature              | HCHO                              | formaldehyde        |
| RH                                              | relative humidity        | C2H2                              | ethyne              |
| P                                               | pressure                 | C2H4                              | ethene              |
| j(NO <sub>2</sub> )                             | photolysis rate constant | C2H6                              | ethane              |
| SO <sub>2</sub>                                 | sulfur dioxide           | C3H6                              | propene             |
| CO                                              | carbon monoxide          | C3H8                              | propane             |
| <b>University of Colorado</b>                   |                          | NC4H10                            | n-butane            |
| O <sub>3</sub>                                  | ozone                    | IC4H10                            | isobutane           |
| <b>National Center for Atmospheric Research</b> |                          | BUT1ENE                           | 1-butene            |
| NO                                              | nitric oxide             | TBUT2ENE                          | trans-2-butene      |
| NO <sub>2</sub>                                 | nitrogen dioxide         | C4H6                              | 1,3-butadiene       |
| <b>University of Minnesota</b>                  |                          | M22C4                             | 2,2-dimethylbutane  |
| C <sub>5</sub> H <sub>8</sub>                   | isoprene                 | M3PE                              | 3-methylpentane     |
| APINENE                                         | monoterpenes             | M2PE                              | 2-methylpentane     |
| CH <sub>3</sub> CHO                             | acetaldehyde             | NC5H <sub>12</sub>                | n-pentane           |
| CH <sub>3</sub> COCH <sub>3</sub>               | acetone                  | IC5H <sub>12</sub>                | isopentane          |
| BENZENE                                         | benzene                  | NC6H <sub>14</sub>                | hexane              |
| CH <sub>3</sub> OH                              | methanol                 | NC7H <sub>17</sub>                | n-heptane           |
| TOLUENE                                         | toluene                  | NC9H <sub>20</sub>                | nonane              |
| MVK                                             | methyl vinyl ketone      | MEK                               | methyl ethyl ketone |
| MACR                                            | methacrolein             | MGLYOX                            | methylglyoxal       |
| <b>Harvard University</b>                       |                          | C <sub>2</sub> H <sub>5</sub> CHO | propanal            |
| HCHO                                            | formaldehyde             | C <sub>3</sub> H <sub>7</sub> CHO | butanal             |
| <b>SUNY</b>                                     |                          | BENZAL                            | benzaldehyde        |
| HONO                                            | nitrous acid             | EBENZ                             | ethylbenzene        |
|                                                 |                          | TM135B                            | mesitylene          |
|                                                 |                          | OETHTOL                           | 2-ethyltoluene      |
|                                                 |                          | OXYL                              | o-xylene            |
|                                                 |                          | MXYL                              | m-xylenes           |
|                                                 |                          | STYRENE                           | styrene             |

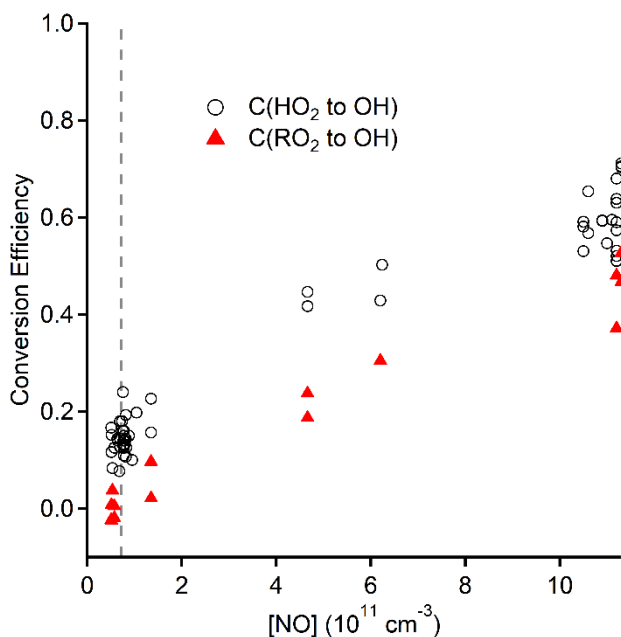

45 **Figure S1:** Conversion efficiencies of HO<sub>2</sub> to OH (black open circles) and isoprene RO<sub>2</sub> to OH (red triangles) as a function of the NO concentration inside the sampling cell. The measured values were obtained from calibrations performed before and during the campaign. The vertical dashed line indicates the NO concentration used for HO<sub>2</sub> measurements.

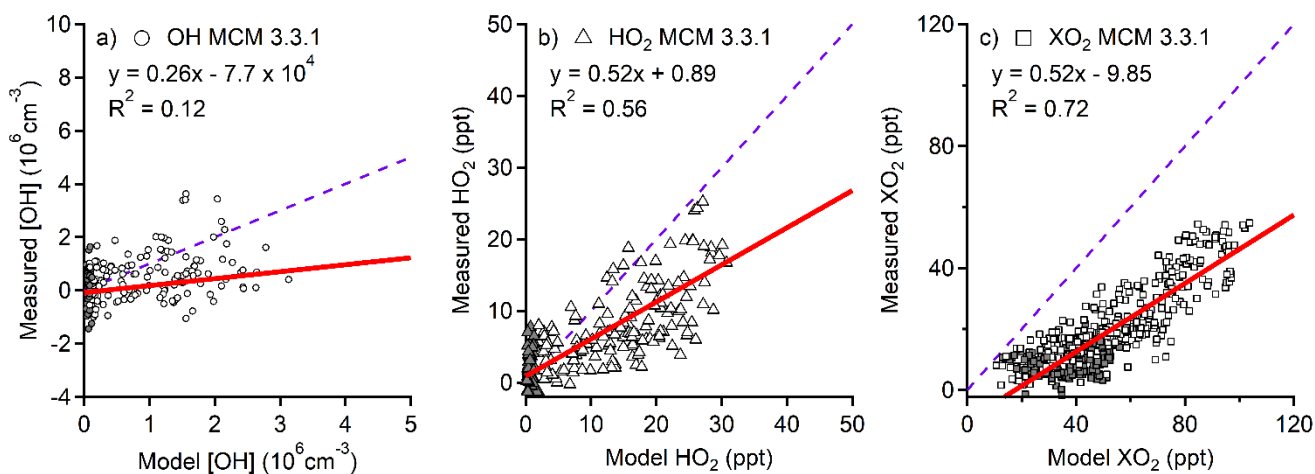

50 **Figure S2:** Correlation plots of modeled radical concentrations (MCM-3.3.1) against measurements of a) OH (circles), b) HO<sub>2</sub> (triangles), and c) XO<sub>2</sub> (squares). Filled symbols denote nighttime and open symbols indicate measurements made during the day. The dashed purple line indicates a 1:1 correlation and the red lines show measurement vs. model regressions of the data weighted by both the precision of the measurements and the uncertainty of the model concentrations.

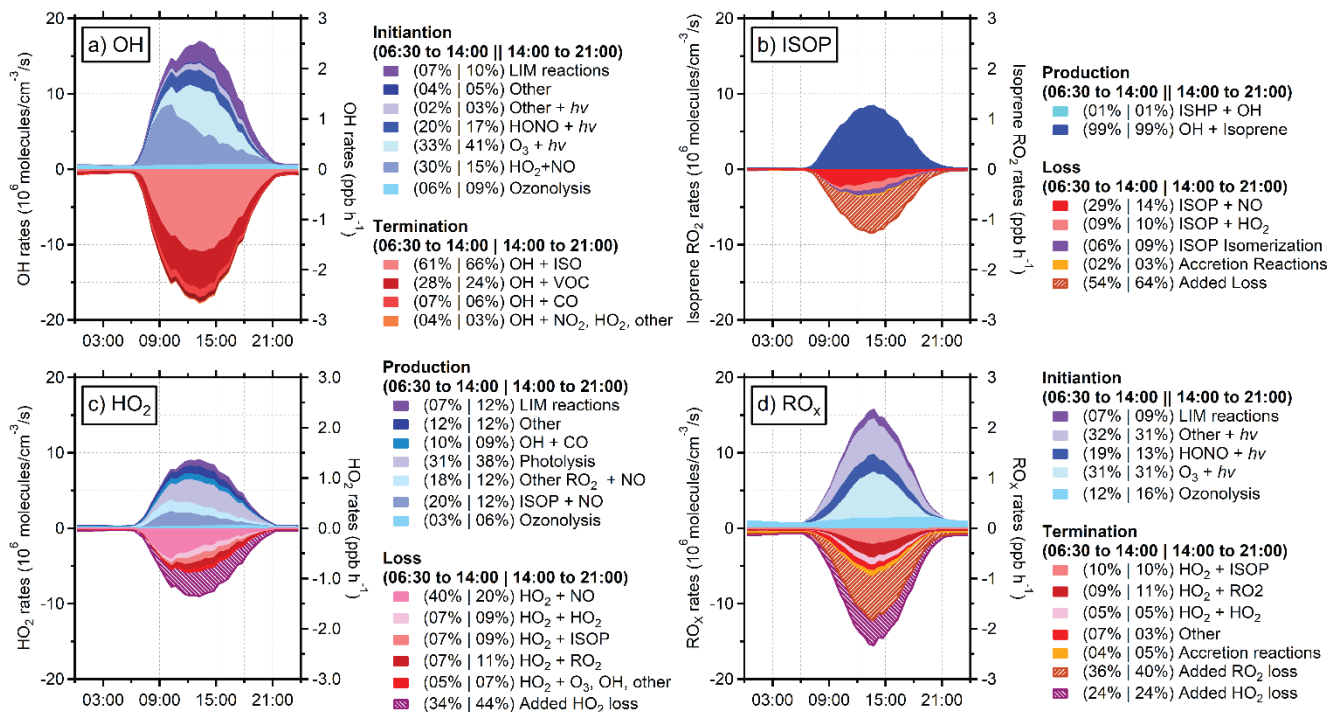

55 **Figure S3: Radical budgets for a) OH, b)  $HO_2$ , c) isoprene- $RO_2$ , and d) total  $RO_x$  radical budget from the RACM2-ACC model with added loss mechanisms for  $HO_2$  and isoprene  $RO_2$ . Shades of blue represent reactions that produce OH, and shades of red represent loss rates, including reactions that propagate to  $RO_2$  or  $HO_2$ . Percentages represent the relative initiation or termination rates of each respective process in the morning (06:30 to 14:00) and during the evening (14:00 to 21:00) which are indicated by the vertical dashed lines.**

60

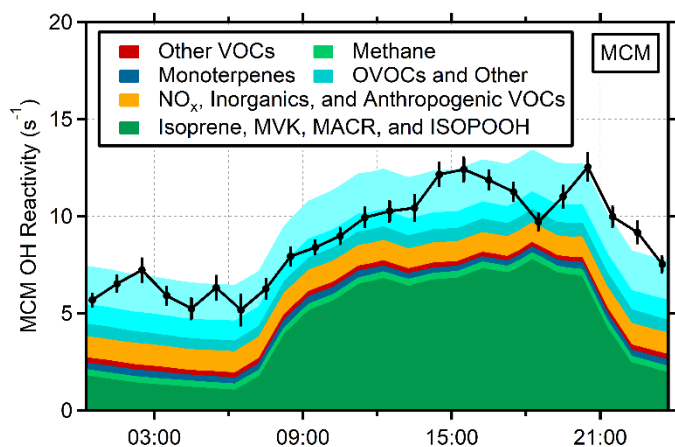

**Figure S4: Diurnal average of the measured (IU-TOHLM instrument) and modeled total OH reactivity at the top of the tower during PROPHET-AMOS. Modeled reactivity is largely based on measured species that are used as constraints in the model but also includes contributions from unmeasured oxidation products in the MCM 3.3.1 model.**

65

## References

Kundu, S., Deming, B. L., Lew, M. M., Bottorff, B. P., Rickly, P., Stevens, P. S., Dusanter, S., Sklaveniti, S., Leonardis, T., Locoge, N., and Wood, E. C.: Peroxy radical measurements by ethane – nitric oxide, chemical amplification and laser-induced fluorescence during the IRRONIC field campaign in a forest in Indiana, *Atmos. Chem. Phys.*, 19, 9563-9579, <https://doi.org/10.5194/acp-19-9563-2019>, 2019.

70
